# Supplementary material for: Effects of poplar addition on tar formation during the co-pyrolysis of fat coal and poplar at high temperature
Source: Royal Society of Chemistry journal article supplement (doi:10.1039/c9ra03938d), 2019-01-01
Supplement: c9ra03938d1.pdf [file c9ra03938d1.pdf]

## Supplementary information

### Effects of poplar addition on tar formation during the co-pyrolysis of fat coal and poplar at high temperature

Shuxing Qiu<sup>a,b,c</sup>, Shengfu Zhang<sup>a,b,\*</sup>, Yunpeng Fang<sup>a,b</sup>, Guibao Qiu<sup>a,b</sup>, Cheng Yin<sup>a,b</sup>, Ramana G. Reddy<sup>c</sup>, Qingyun Zhang<sup>a,b</sup>, Liangying Wen<sup>a,b</sup>

a. College of Materials Science and Engineering, Chongqing University, Chongqing 400044, China, E-mail: zhangsf@cqu.edu.cn, Fax: +023-65112631

b. Chongqing Key Laboratory of Vanadium-Titanium Metallurgy and Advanced Materials, Chongqing University, Chongqing 400044, China.

c. Department of Metallurgical and Materials Engineering, College of Engineering, The University of Alabama, Tuscaloosa, 35487, USA.

\* Corresponding author

**Table S1** Chemical compounds in tar from fat coal, poplar and their blends obtained from GC-MS analysis(%).

**Table S2** Band assignments of proton types in <sup>1</sup>H NMR spectra.

**Fig. S1** Schematic diagram of self-made tar collecting device.

**Table S1** Chemical compounds in tar from fat coal, poplar and their blends obtained from GC-MS analysis(%).

| No. | Time/min | Compounds                            | F tar | FP4 tar | FP8 tar | FP12 tar | FP16 tar | FP32 tar | P tar |
|-----|----------|--------------------------------------|-------|---------|---------|----------|----------|----------|-------|
| 1   | 2.63     | Furfural                             | -     | -       | -       | -        | 1.01     | 1.02     | 1.09  |
| 2   | 2.77     | 2-Furanmethanol                      | -     | -       | -       | -        | -        | -        | 1.12  |
| 3   | 3.03     | m-Xylene                             | 1.10  | 2.26    | 1.69    | 1.94     | 2.21     | 1.07     | -     |
| 4   | 3.10     | n-Butyl ether                        | 1.35  | 2.99    | 2.63    | 4.30     | 3.14     | 1.04     | 1.30  |
| 5   | 3.39     | Propanoic acid butyl ester           | 3.45  | 6.82    | 6.10    | 8.45     | 6.75     | 2.28     | 3.14  |
| 6   | 4.05     | 2-methyl-Propanoic acid, butyl ester | 1.57  | 1.01    | 2.33    | 3.33     | 1.02     | 1.03     | 1.01  |
| 7   | 4.47     | Phenol                               | 2.85  | 4.51    | 6.37    | 7.5      | 5.82     | 4.83     | 8.26  |
| 8   | 4.78     | Butanoic acid butyl ester            | 13.55 | 8.65    | 13.49   | 14.33    | 7.97     | 4.35     | 8.76  |
| 9   | 4.87     | 1,2,4-Trimethylbenzene               | 1.17  | 2.10    | 1.64    | 1.46     | 1.98     | 1.30     | -     |
| 10  | 5.31     | 2-hydroxy-3-methyl-1-one             | -     | -       | -       | -        | -        | -        | 1.77  |
| 11  | 5.79     | 2-Methylphenol                       | 4.02  | 4.93    | 6.17    | 8.74     | 4.95     | 3.98     | 2.96  |
| 12  | 6.18     | 3-Methylphenol                       | 5.73  | 6.45    | 8.95    | 9.06     | 6.75     | 4.83     | 3.92  |
| 13  | 6.46     | 1-Ethyl-3,5-dimethylbenzene          | -     | 1.02    | 1.64    | 1.09     | 1.28     | 2.61     | 8.48  |
| 14  | 7.50     | 2,4-Dimethylphenol                   | 3.24  | 3.25    | 3.22    | 2.70     | 3.43     | 3.32     | 1.75  |
| 15  | 7.87     | 3,5-Dimethylphenol                   | 1.60  | 1.47    | 1.54    | 1.25     | 1.51     | 1.66     | -     |
| 16  | 8.32     | 2,3-Dimethylhydroquinone             | 3.42  | 4.41    | 4.32    | 4.02     | 3.38     | 4.12     | 14.83 |
| 17  | 9.27     | 2-ethyl-5-Methylphenol               | 1.46  | 1.15    | 1.39    | 1.59     | 1.22     | 2.67     | -     |
| 18  | 9.37     | 3-ethyl-5-Methylphenol               | 1.25  | -       | -       | -        | -        | -        | 4.51  |
| 19  | 9.70     | 4-ethyl-2-Methoxyphenol              | -     | -       | -       | -        | -        | -        | 4.81  |
| 20  | 9.84     | 4-methyl-Benzenediol                 | -     | -       | -       | -        | -        | -        | 4.30  |
| 21  | 10.15    | 2-methyl-Naphthalene                 | 4.91  | 4.88    | 3.77    | 3.74     | 4.48     | 4.56     | -     |
| 22  | 10.27    | 2-methoxy-4-Viinyphenol              | -     | -       | -       | -        | -        | -        | 3.33  |
| 23  | 10.39    | 2-methyl-Naphthalene                 | 2.24  | 2.20    | 1.83    | 1.73     | 2.15     | 2.34     | -     |
| 24  | 10.79    | 2,6-Dimethoxyphenol                  | -     | -       | -       | -        | -        | -        | 2.53  |
| 25  | 11.26    | 4-Ethylcatechol                      | -     | -       | -       | -        | -        | -        | 2.40  |
| 26  | 11.57    | Tetradecane                          | -     | -       | -       | -        | -        | -        | 1.51  |
| 27  | 11.66    | 2-methoxy-5-(1-propenyl)-Phenol      | -     | -       | -       | -        | -        | -        | 1.10  |
| 28  | 11.80    | 1,5-Dimethylnaphthalene              | 1.81  | 1.73    | 1.44    | 2.49     | 1.46     | 2.20     | -     |
| 29  | 11.99    | 1,7-Dimethylnaphthalen               | 3.45  | 3.15    | 2.98    | 2.36     | 2.85     | 3.20     | -     |
| 30  | 12.29    | 1,3-Dimethylnaphthalene              | 1.78  | 1.78    | 1.78    | 1.94     | 2.27     | 3.73     | 4.64  |
| 31  | 12.45    | Biphenylene                          | -     | -       | -       | -        | 1.11     | 1.42     | -     |
| 32  | 13.19    | 1,4,6-Trimethylnaphthalene           | 1.46  | 1.31    | 1.34    | 1.04     | 2.04     | 3.38     | -     |
| 33  | 13.33    | 1-Naphthalenol                       | -     | -       | -       | -        | -        | -        | 1.19  |
| 34  | 14.28    | Fluorene                             | 2.13  | 1.94    | 1.74    | 1.32     | 1.57     | 2.76     | -     |
| 35  | 15.50    | 5-ethyl-5-Propylundecane             | -     | -       | -       | -        | -        | -        | 1.58  |
| 36  | 16.75    | Anthracene                           | 2.21  | 1.99    | 1.89    | 1.66     | 1.92     | 2.28     | -     |
| 37  | 18.01    | 9-Methylantracene                    | 1.49  | 1.42    | 1.29    | 1.04     | 1.22     | 1.45     | -     |
| 38  | 18.08    | 1-Methylantracene                    | 2.03  | 1.78    | 1.71    | 1.25     | 1.63     | 1.96     | -     |
| 39  | 18.28    | 2-Methylantracene                    | 1.78  | 1.58    | 1.44    | -        | 1.16     | 1.60     | -     |
| 40  | 18.81    | 4-Methylphenanthrene                 | 1.46  | 1.02    | 1.14    | -        | 1.05     | 1.54     | -     |
| 41  | 19.45    | 2,5-Dimethylphenanthrene             | 2.21  | 1.99    | 1.84    | -        | 1.69     | 2.04     | -     |
| 42  | 20.37    | Pyrene                               | 1.21  | 1.06    | -       | -        | 1.01     | 1.09     | -     |
| 43  | 21.27    | Benzofluorene                        | 1.39  | 1.32    | 1.14    | -        | 1.05     | 1.30     | -     |
| 44  | 22.38    | o-Terphenyl                          | 2.03  | 1.93    | -       | -        | 1.08     | 2.04     | -     |
| 45  | 23.55    | Chrysene                             | 1.74  | 1.31    | -       | -        | 1.03     | 1.07     | -     |
| 46  | 24.51    | 1-Methylchrysene                     | 1.35  | 1.26    | -       | -        | 1.01     | 1.04     | -     |
|     |          | Others*                              | 17.56 | 15.33   | 13.19   | 11.67    | 15.80    | 18.89    | 9.71  |

\*Tar components with their individual content less than 1.00%.

**Table S2** Band assignments of proton types in  $^1\text{H}$  NMR spectra.

| Proton type             | Chemical shift (ppm) | Assignment                                                                                                                                                                                                     |
|-------------------------|----------------------|----------------------------------------------------------------------------------------------------------------------------------------------------------------------------------------------------------------|
| $\text{H}_{\text{ar}}$  | 6.3-9.5              | Aromatic protons                                                                                                                                                                                               |
| $\text{H}_{\text{ar2}}$ | 8.3-9.5              | Aromatic hydrogens sterically hindered: 'bay', 'fjord' and other geometrically similar zones in angular polycyclic aromatic compounds; aromatic hydrogens in very pericondensed polycyclic aromatic compounds. |
| $\text{H}_{\text{ar1}}$ | 6.3-8.3              | All the other aromatic hydrogens                                                                                                                                                                               |
| $\text{H}_{\text{al}}$  | 0.5-4.5              | Aliphatic protons                                                                                                                                                                                              |
| $\text{H}_{\alpha}$     | 2.1-4.5              | Protons of $\text{CH}$ , $\text{CH}_2$ or $\text{CH}_3$ in the $\alpha$ position to the aromatic                                                                                                               |
| $\text{H}_{\beta}$      | 1.2-2.1              | Protons of $\text{CH}$ or $\text{CH}_2$ in the $\beta$ position or further away from the aromatic ring/Protons of $\text{CH}_3$ in the $\beta$ position of aromatic ring                                       |
| $\text{H}_{\gamma}$     | 0.5-1.2              | Protons of $\text{CH}_3$ in the $\gamma$ position or further away from the aromatic ring                                                                                                                       |

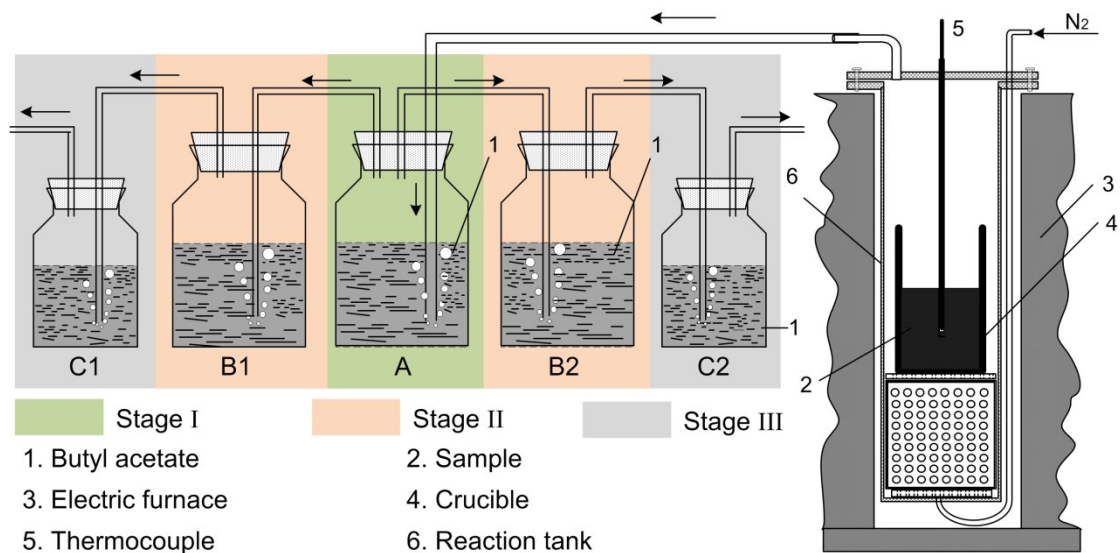

**Fig. S1** Schematic diagram of self-made tar collecting device.
